# Supplementary material for: Abundance and Growth of the European Eels (Anguilla anguilla Linnaeus, 1758) in Small Estuarine Habitats from the Eastern English Channel
Source: MDPI journal article supplement (doi:10.3390/fishes7050213), 2022-08-23
Supplement: s1 [file s1]

# Supplementary Materials: Abundance and Growth of the European Eels (*Anguilla anguilla* Linnaeus, 1758) in Small Estuarine Habitats from the Eastern English Channel

**Table S1.** Number of individuals (N) analyzed of female and male eels for the six estuaries from the North to the South and their mean  $\pm$  standard deviation (sd) and range (min–max) of total length (mm), total weight (g) and age-at-capture (year).

| Estuary  | Female |                              |                                 |                       | Male |                             |                               |                       |
|----------|--------|------------------------------|---------------------------------|-----------------------|------|-----------------------------|-------------------------------|-----------------------|
|          | N      | Mean length $\pm$ sd         | Mean weight $\pm$ sd            | Mean age $\pm$ sd     | N    | Mean length $\pm$ sd        | Mean weight $\pm$ sd          | Mean age $\pm$ sd     |
|          |        | min–max                      | min–max                         | min–max               |      | min–max                     | min–max                       | min–max               |
| Slack    | 25     | 449.9 $\pm$ 125.5<br>295–699 | 210.8 $\pm$ 187.1<br>49.6–810   | 8.7 $\pm$ 3.3<br>5–16 | 23   | 363.2 $\pm$ 51.8<br>295–483 | 90.0 $\pm$ 40.7<br>49.6–214.3 | 6.8 $\pm$ 1.6<br>5–10 |
| Wimereux | 31     | 422.1 $\pm$ 129.9<br>286–700 | 179.3 $\pm$ 188.9<br>42.5–769   | 8.1 $\pm$ 3.1<br>4–15 | 26   | 346.2 $\pm$ 46.1<br>286–462 | 76.9 $\pm$ 35.6<br>42.5–181.9 | 6.8 $\pm$ 1.5<br>4–10 |
| Liane    | 36     | 500.6 $\pm$ 146.3<br>281–810 | 310.0 $\pm$ 287.3<br>36.9–1180  | 8.3 $\pm$ 2.5<br>5–13 | 19   | 370.3 $\pm$ 57.4<br>281–494 | 93.8 $\pm$ 49.9<br>36.9–246.6 | 6.3 $\pm$ 1.6<br>4–9  |
| Canche   | 31     | 428.9 $\pm$ 115.2<br>260–665 | 176.7 $\pm$ 152.8<br>32.1–597.7 | 8.2 $\pm$ 3.2<br>5–21 | 20   | 345.8 $\pm$ 36.3<br>260–418 | 78.6 $\pm$ 26.8<br>32.1–149.5 | 6.6 $\pm$ 1.3<br>5–10 |
| Authie   | 40     | 452.9 $\pm$ 114.7<br>287–739 | 211.8 $\pm$ 174.1<br>38.9 – 780 | 8.3 $\pm$ 2.1<br>5–13 | 21   | 368.9 $\pm$ 62.3<br>287–482 | 99.4 $\pm$ 52.8<br>38.9–235.5 | 7.4 $\pm$ 1.8<br>5–13 |
| Somme    | 33     | 513.2 $\pm$ 159.0<br>321–924 | 317.4 $\pm$ 334.7<br>54–1330    | 8.9 $\pm$ 3.5<br>5–19 | 17   | 384.1 $\pm$ 46.2<br>321–467 | 95.1 $\pm$ 34.3<br>54.0–176.2 | 6.9 $\pm$ 1.4<br>5–10 |

**Table S2.** Parameters of non-linear growth models for female and male eels collected in the six estuaries with  $TL_{\infty}$  the asymptotic length,  $k$  the rate at which the asymptote is reached,  $TL_1$  the length in the first year,  $t_0$  no biological significance and AIC the Akaike Information Criterion to select the optimal growth model. vbp Von Bertalanffy model, vbt0p Von Bertalanffy model forced at  $t_0=0$ , vbL1p Von Bertalanffy model forced at  $TL_1$ , gp.p Gompertz model, and log.p Logistic model.

| Models | Female        |      |        |       |          | Male          |      |        |       |         |
|--------|---------------|------|--------|-------|----------|---------------|------|--------|-------|---------|
|        | $TL_{\infty}$ | $k$  | $TL_1$ | $t_0$ | AIC      | $TL_{\infty}$ | $k$  | $TL_1$ | $t_0$ | AIC     |
| vbp    | 1155.3        | 0.05 |        | -0.9  | 18188.54 | 606           | 0.10 |        | -0.8  | 8361.05 |
| vbt0p  | 810.5         | 0.09 |        | 0.0   | 18277.58 | 438           | 0.20 |        | 0.0   | 8455.67 |
| vbL1p  | 1155.3        | 0.05 | 101.7  |       | 18188.54 | 606           | 0.10 | 101.4  |       | 8361.05 |
| gp.p   | 725.5         | 0.17 | 113.4  |       | 18185.89 | 453           | 0.26 | 105.2  |       | 8357.17 |
| log.p  | 638.4         | 0.30 | 95.9   |       | 18225.73 | 409           | 0.42 | 79.2   |       | 8367.24 |

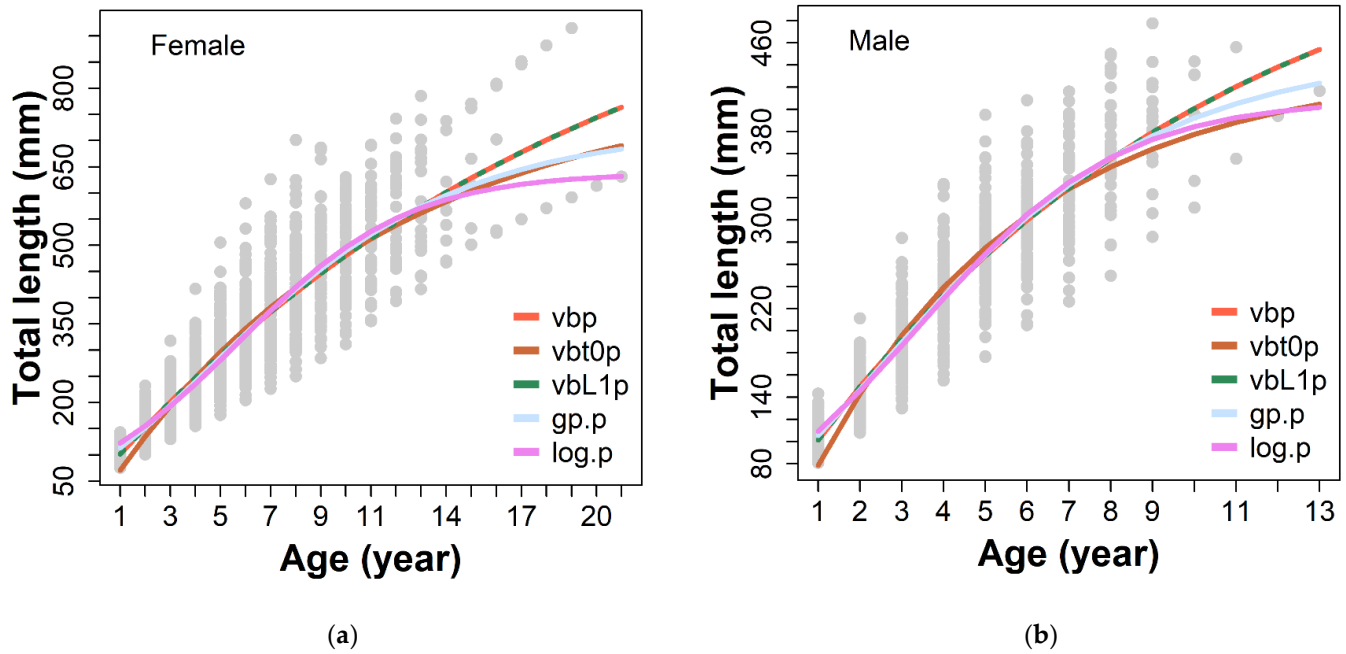

**Figure S1.** Non-linear growth models of (a) female and (b) male eels collected in the six estuaries. vbp Von Bertalanffy model, vbt0p Von Bertalanffy model forced at  $t_0=0$ , vbL1p Von Bertalanffy model forced at  $TL_1$ , gp.p Gompertz model, and log.p Logistic model.
